# Supplementary material
Source: publisher figshare collection journal article supplement (https://sage.figshare.com/ndownloader/files/16236332)
Supplement: Supplementary file 1 [file 16236332]

# Instructions to run the codes

The following files should be in the same location:

❖ Functions called:

- `grossberg.m` >> function for the reference network, G-N
- `eckhorn.m` >> function for the pulse-coded neural network (PCNN), E-N
- `eckhorn_noadapt.m` >> function for the PCNN, but without incorporating the adaptive weights
- `adapt.m` >> function for the adaptation algorithm
- `spikesMPA.m` >> function for transforming spike-activities to level-activities
- `step1.m` >> unit step function

❖ Scripts to run:

- `plot_figures3.m` >> script to plot the G-N response to three-different stimuli conditions
  - functions called: `grossberg.m`
- `plot_figures5.m` >> script to plot the E-N (without adaptation) response to three-different stimuli conditions
  - functions called: `eckhorn_noadapt.m`
- `generate_performance_surface.m` >> script to generate the empirical surface (choose: conditioned or conditioning) and writing the files `ConditionedEmpiricalData.xls` and `ConditioningEmpiricalData.xls`. NOTE: This might take about 2hours to run.
  - functions called: `grossberg.m`, `eckhorn.m` and `spikesMPA.m`
- `plot_performance_surface.m` >> script to plot the performance surface 3D or 2D (side view) of either conditioned or conditioning surfaces by loading the respective .xls file
- `implement_adaptation.m` >> script to run the adaptation algorithm on the E-N and writes the result into `AdapData.xls`. NOTE: This might take about 1hour to run.
  - functions called: `grossberg.m`, `eckhorn.m`, `spikesMPA.m` and `adapt.m`
- `plot_learningcurves.m` >> script to load the `AdapData.xls` and plot the learning curves: weights learning curves or conditioning learning curve, and gradient estimates.
